# Supplementary material for: Ubiquitin ligase TRIM71 suppresses ovarian tumorigenesis by degrading mutant p53
Source: PubMed Central journal article supplement (PMC6769007; doi:10.1038/s41419-019-1977-3), 2019-09-30

Figure S1 (related to Figure 4)

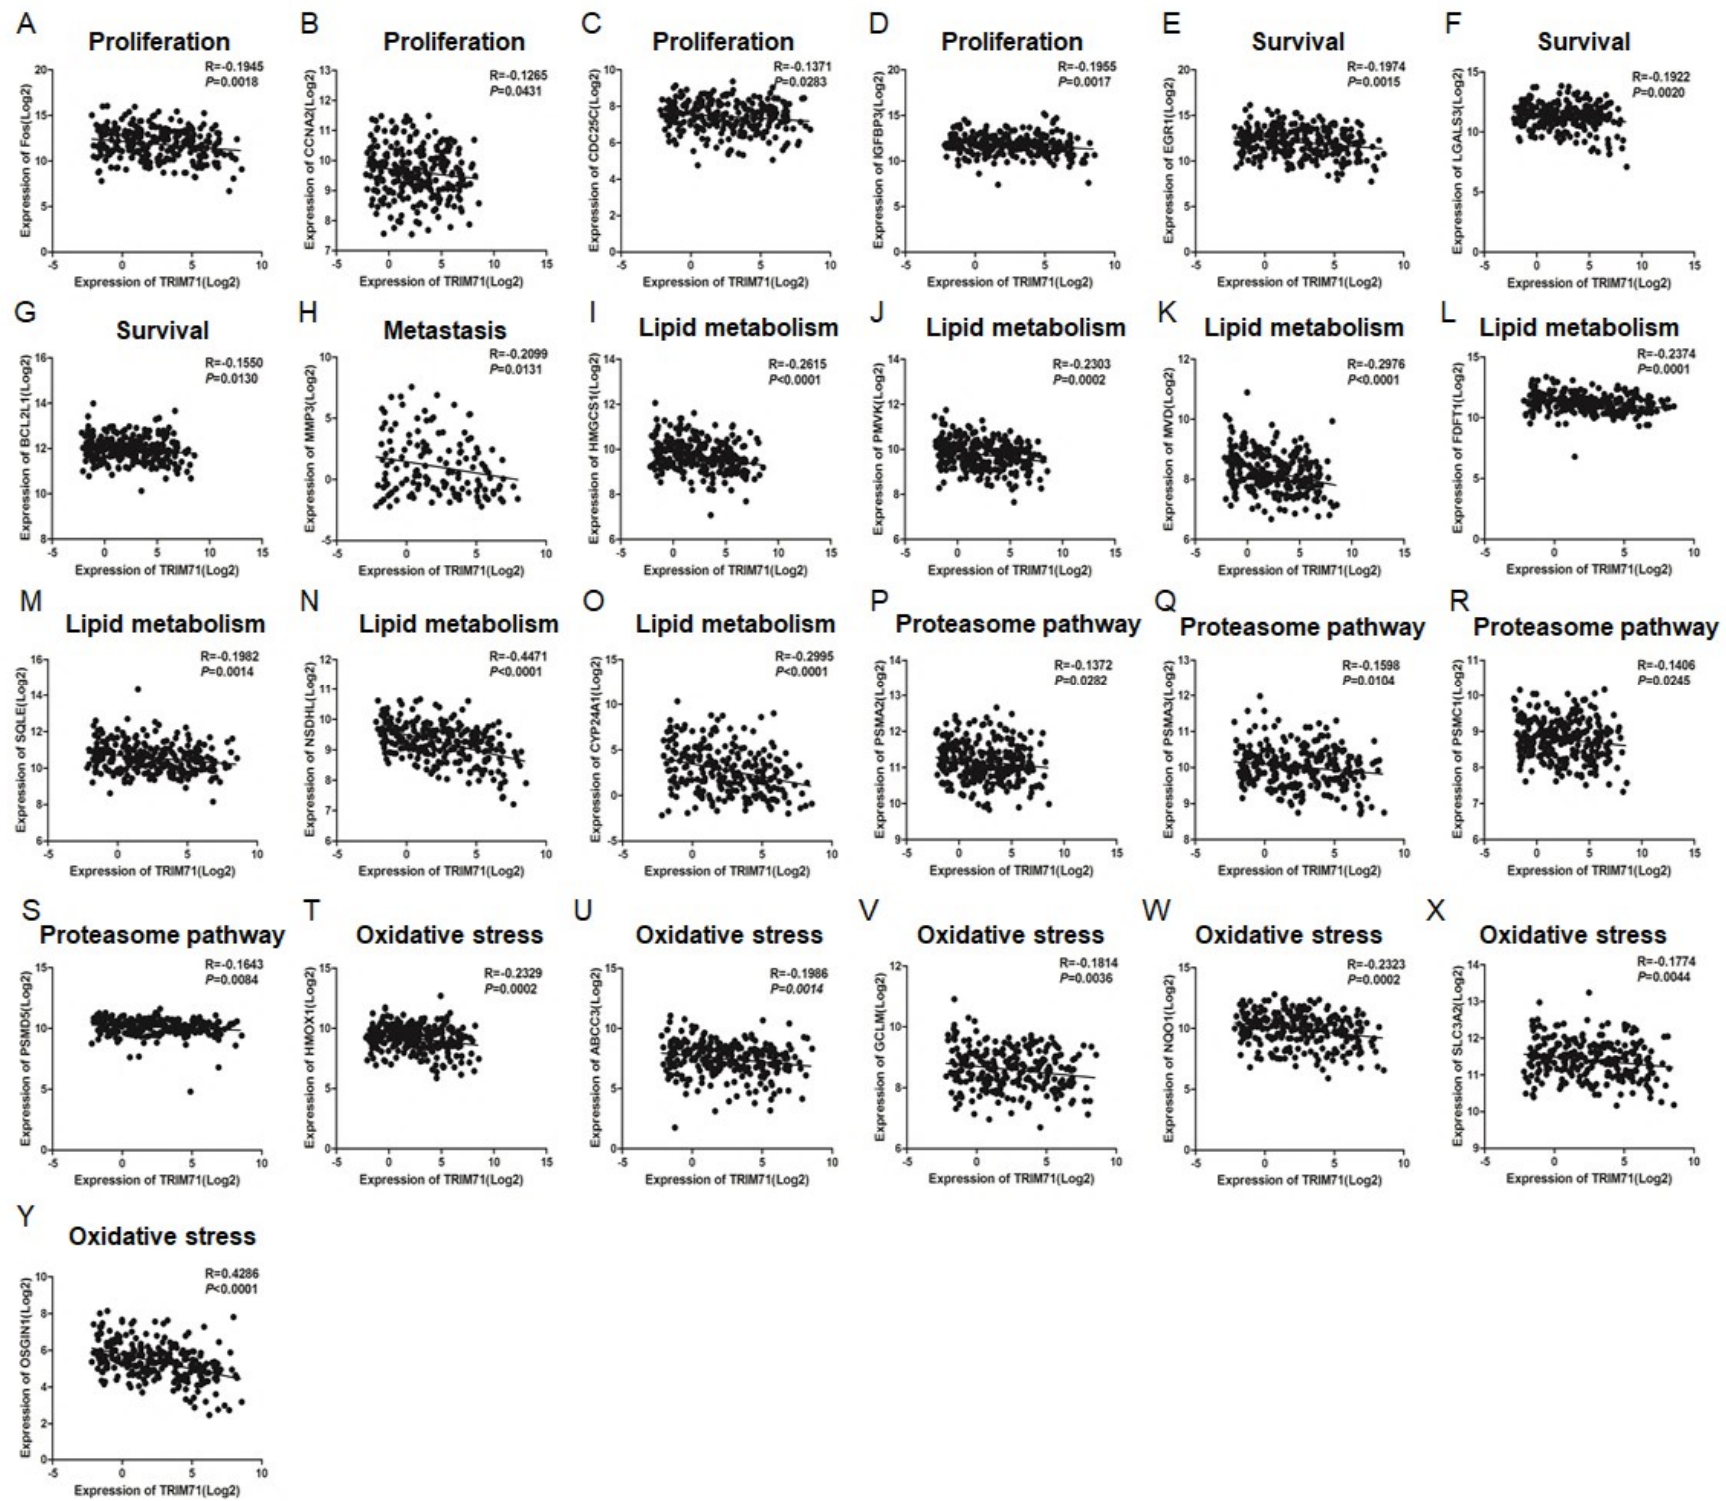

# Figure S2 (compared with Figure 4)

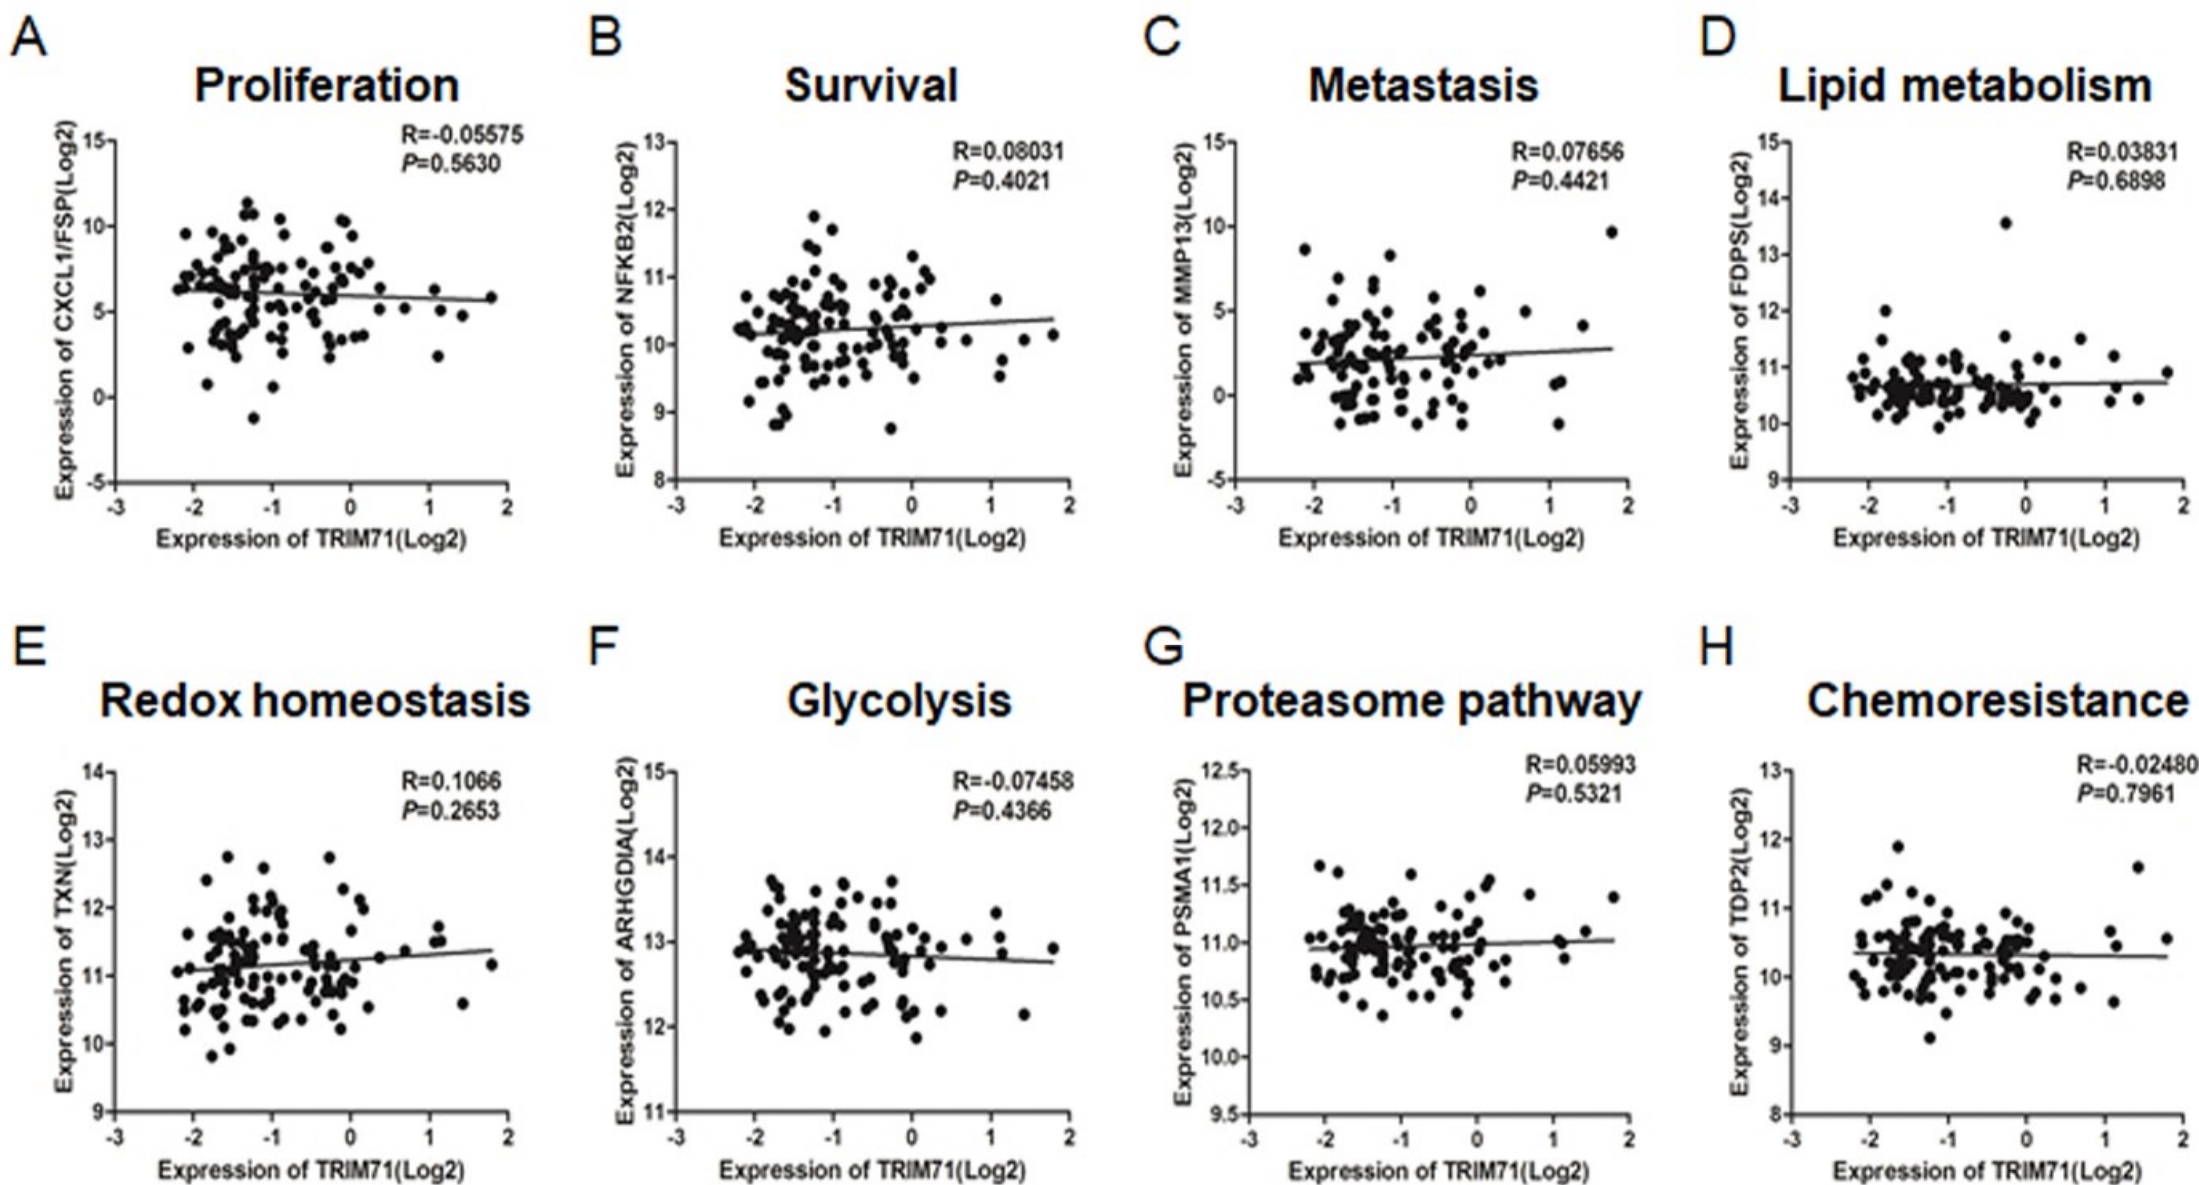

**Figure S3 (compared with Figure S1)**

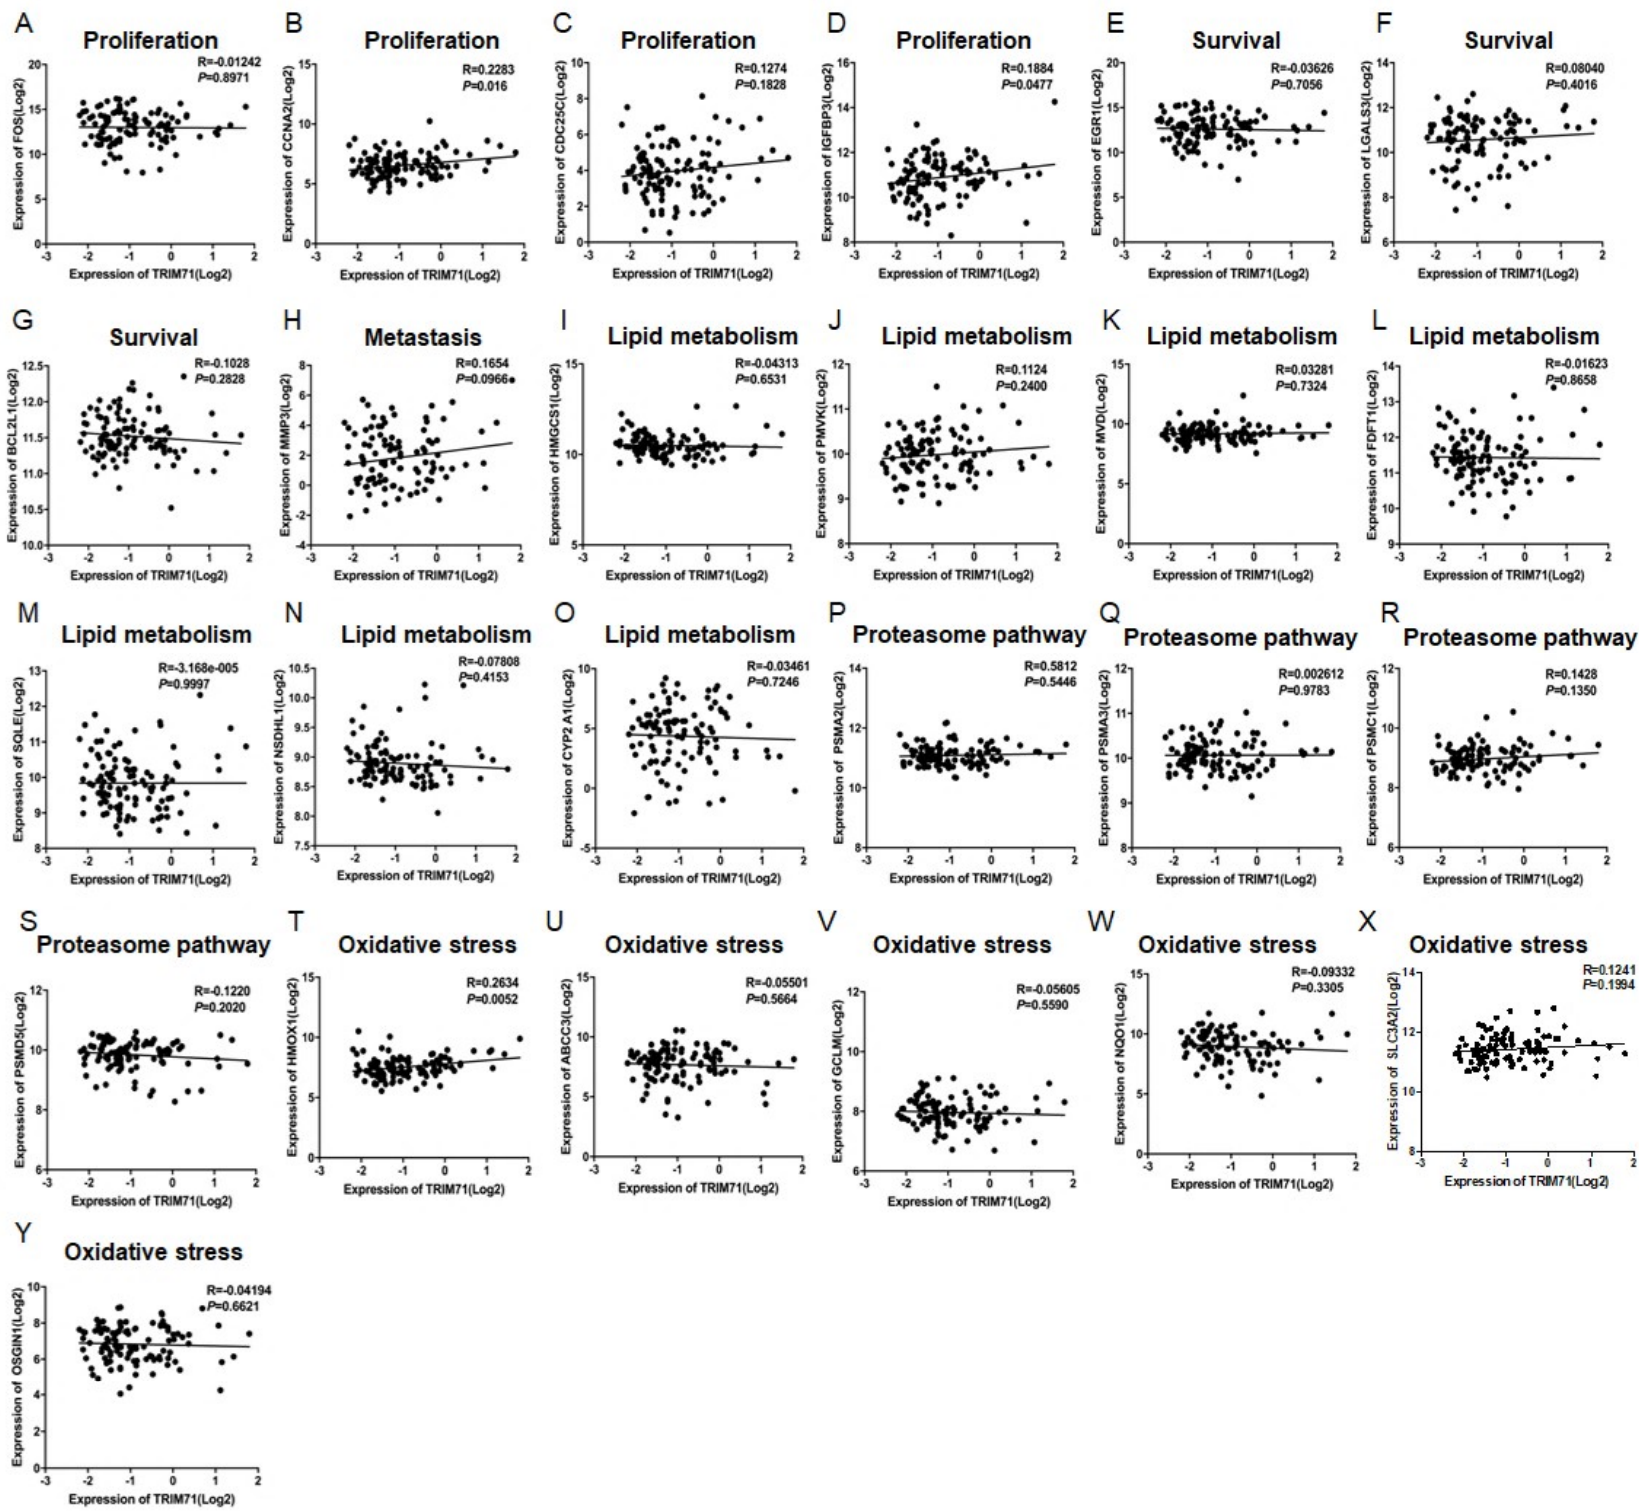

# Figure S4

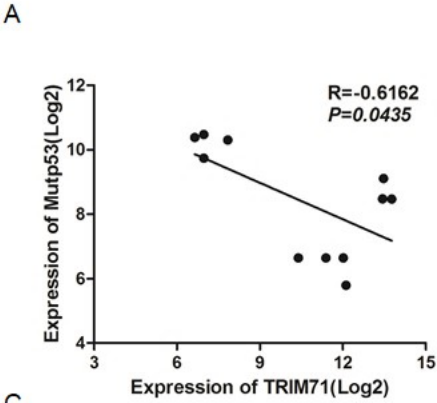

**B** TP53-exon sequencing of 11 ovarian cancer samples with missense mutations

| Sample NO. | Position    | TP53 Mutation | Amino acids | Flanking Sequences                             |
|------------|-------------|---------------|-------------|------------------------------------------------|
| 1          | TP53-Exon 5 | CAT-GAT       | H179D       | GTGAGGCGCTGCCCCAC(C/CG)ATGAGCGCTGCTCAGATAGCGA  |
| 2          | TP53-Exon 8 | CGT-CCT       | R273P       | ACGGAACAGCTTTGAGGTGC(G/GC)TGTTTGTGCCTGCTCGGGA  |
| 3          | TP53-Exon 7 | CGG-TGG       | R248W       | CCTGCATGGGCGGCATGAAC(C/CT)GGAGGCCCATCCTCACCATC |
| 4          | TP53-Exon 7 | TCC-TTC       | S241F       | CAACTACATGTGAACAGTT(C/T)CTGCATGGGCGGCATGAACC   |
| 5          | TP53-Exon 8 | CGT-TGT       | R273C       | GACGGAACAGCTTTGAGGTG(C/CT)GTGTTTGTGCCTGCTCGGG  |
| 6          | TP53-Exon 7 | GGC-AGC       | G245S       | GTAACAGTTCCTGCATGGGC(G/GA)GCATGAACCGGAGGCCATC  |
| 7          | TP53-Exon 6 | TAT-TGT       | Y220C       | ACATAGTGTGGTGGTGCCCT(A/AG)TGAGCCGCCTGAGGTCTGGT |
| 8          | TP53-Exon 7 | ATG-GTG       | M246V       | ACAGTTCCTGCATGGGCGGC(A/G)TGAAACCGGAGGCCATCCTC  |
| 9          | TP53-Exon 6 | TAT-TGT       | Y205C       | AGGAAATTTGCGTGTGAGT(A/AG)TTTGGATGACAGAAACACTT  |
| 10         | TP53-Exon 5 | CAT-CAG       | H179Q       | GTGAGGCGCTGCCCCACCA(T/TG)GAGCGCTGCTCAGATAGCGA  |
| 11         | TP53-Exon 6 | ATC-AAC       | I195N       | GGCCCTCCTCAGCATCTTA(T/TA)CCGAGTGGAAAGAAATTTGC  |

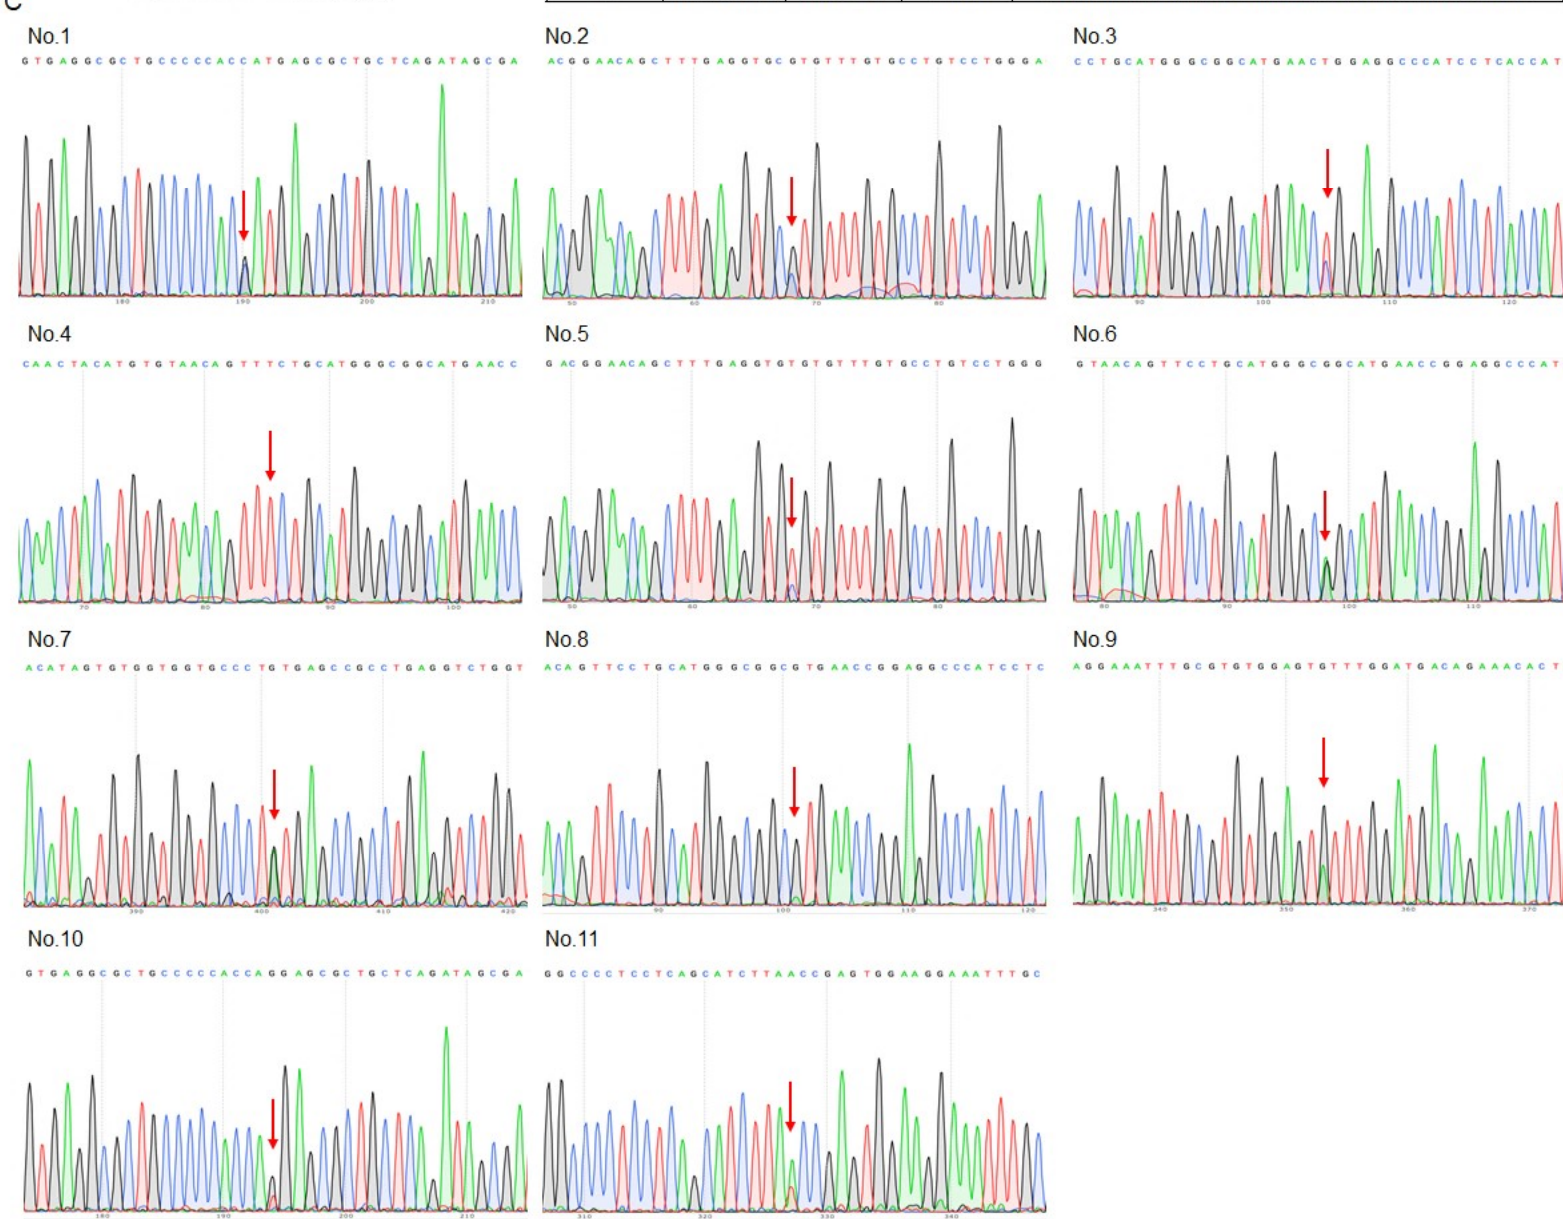

# Figure S5 (related to Figure 5)

**A**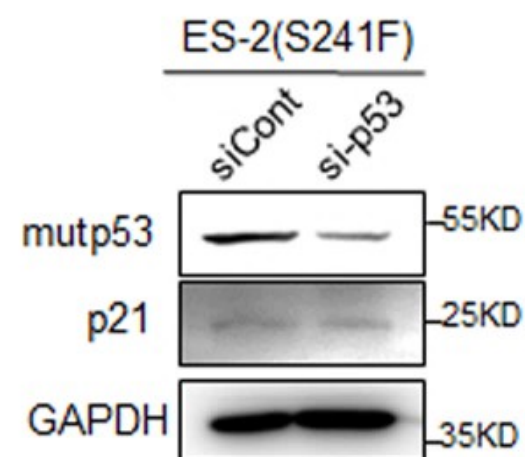**B**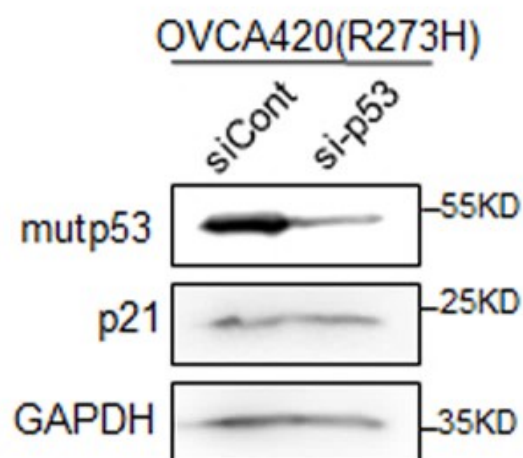**C**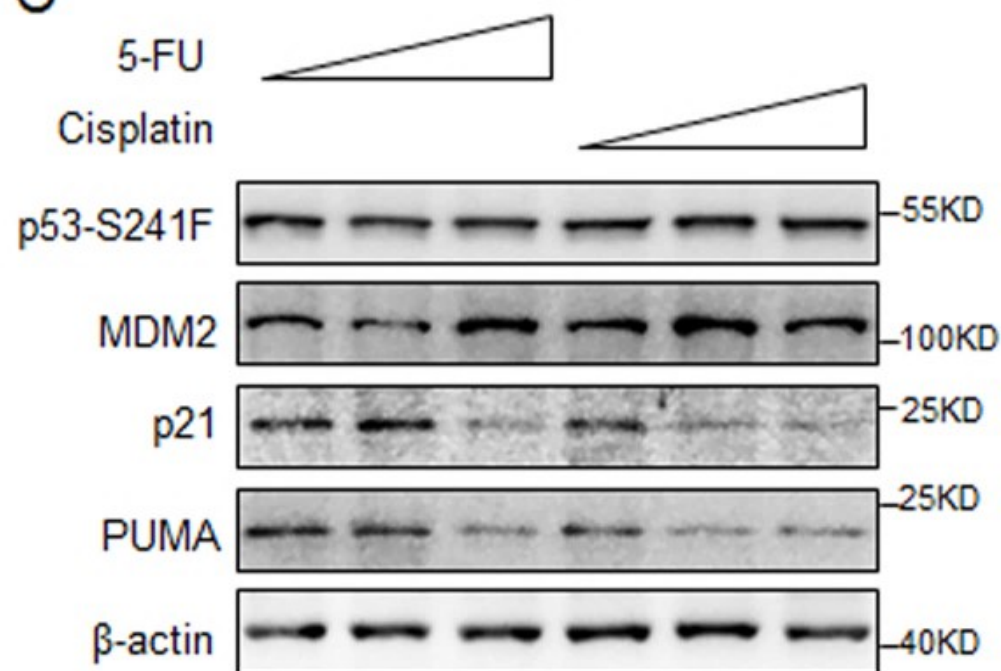**D****ES-2**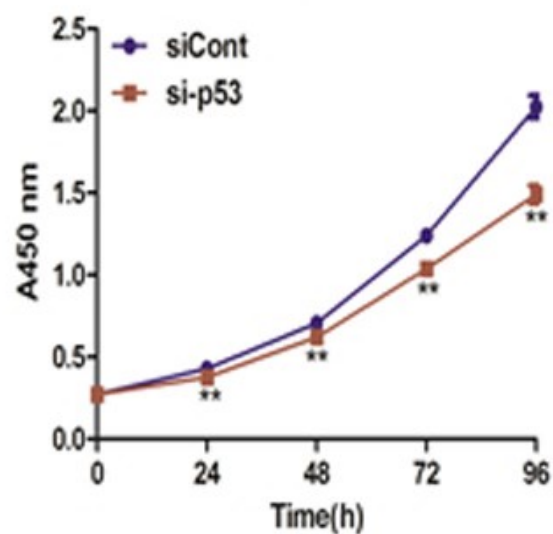**E**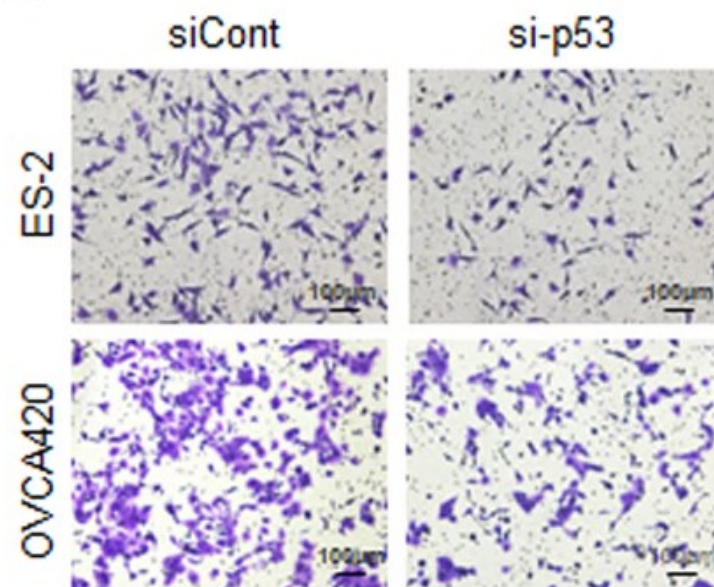**F**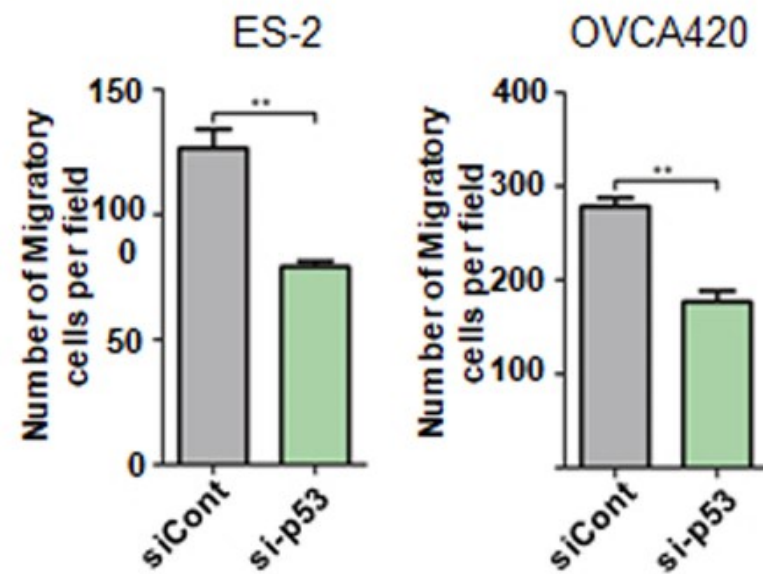

**Figure S6 (related to Figure 5)**

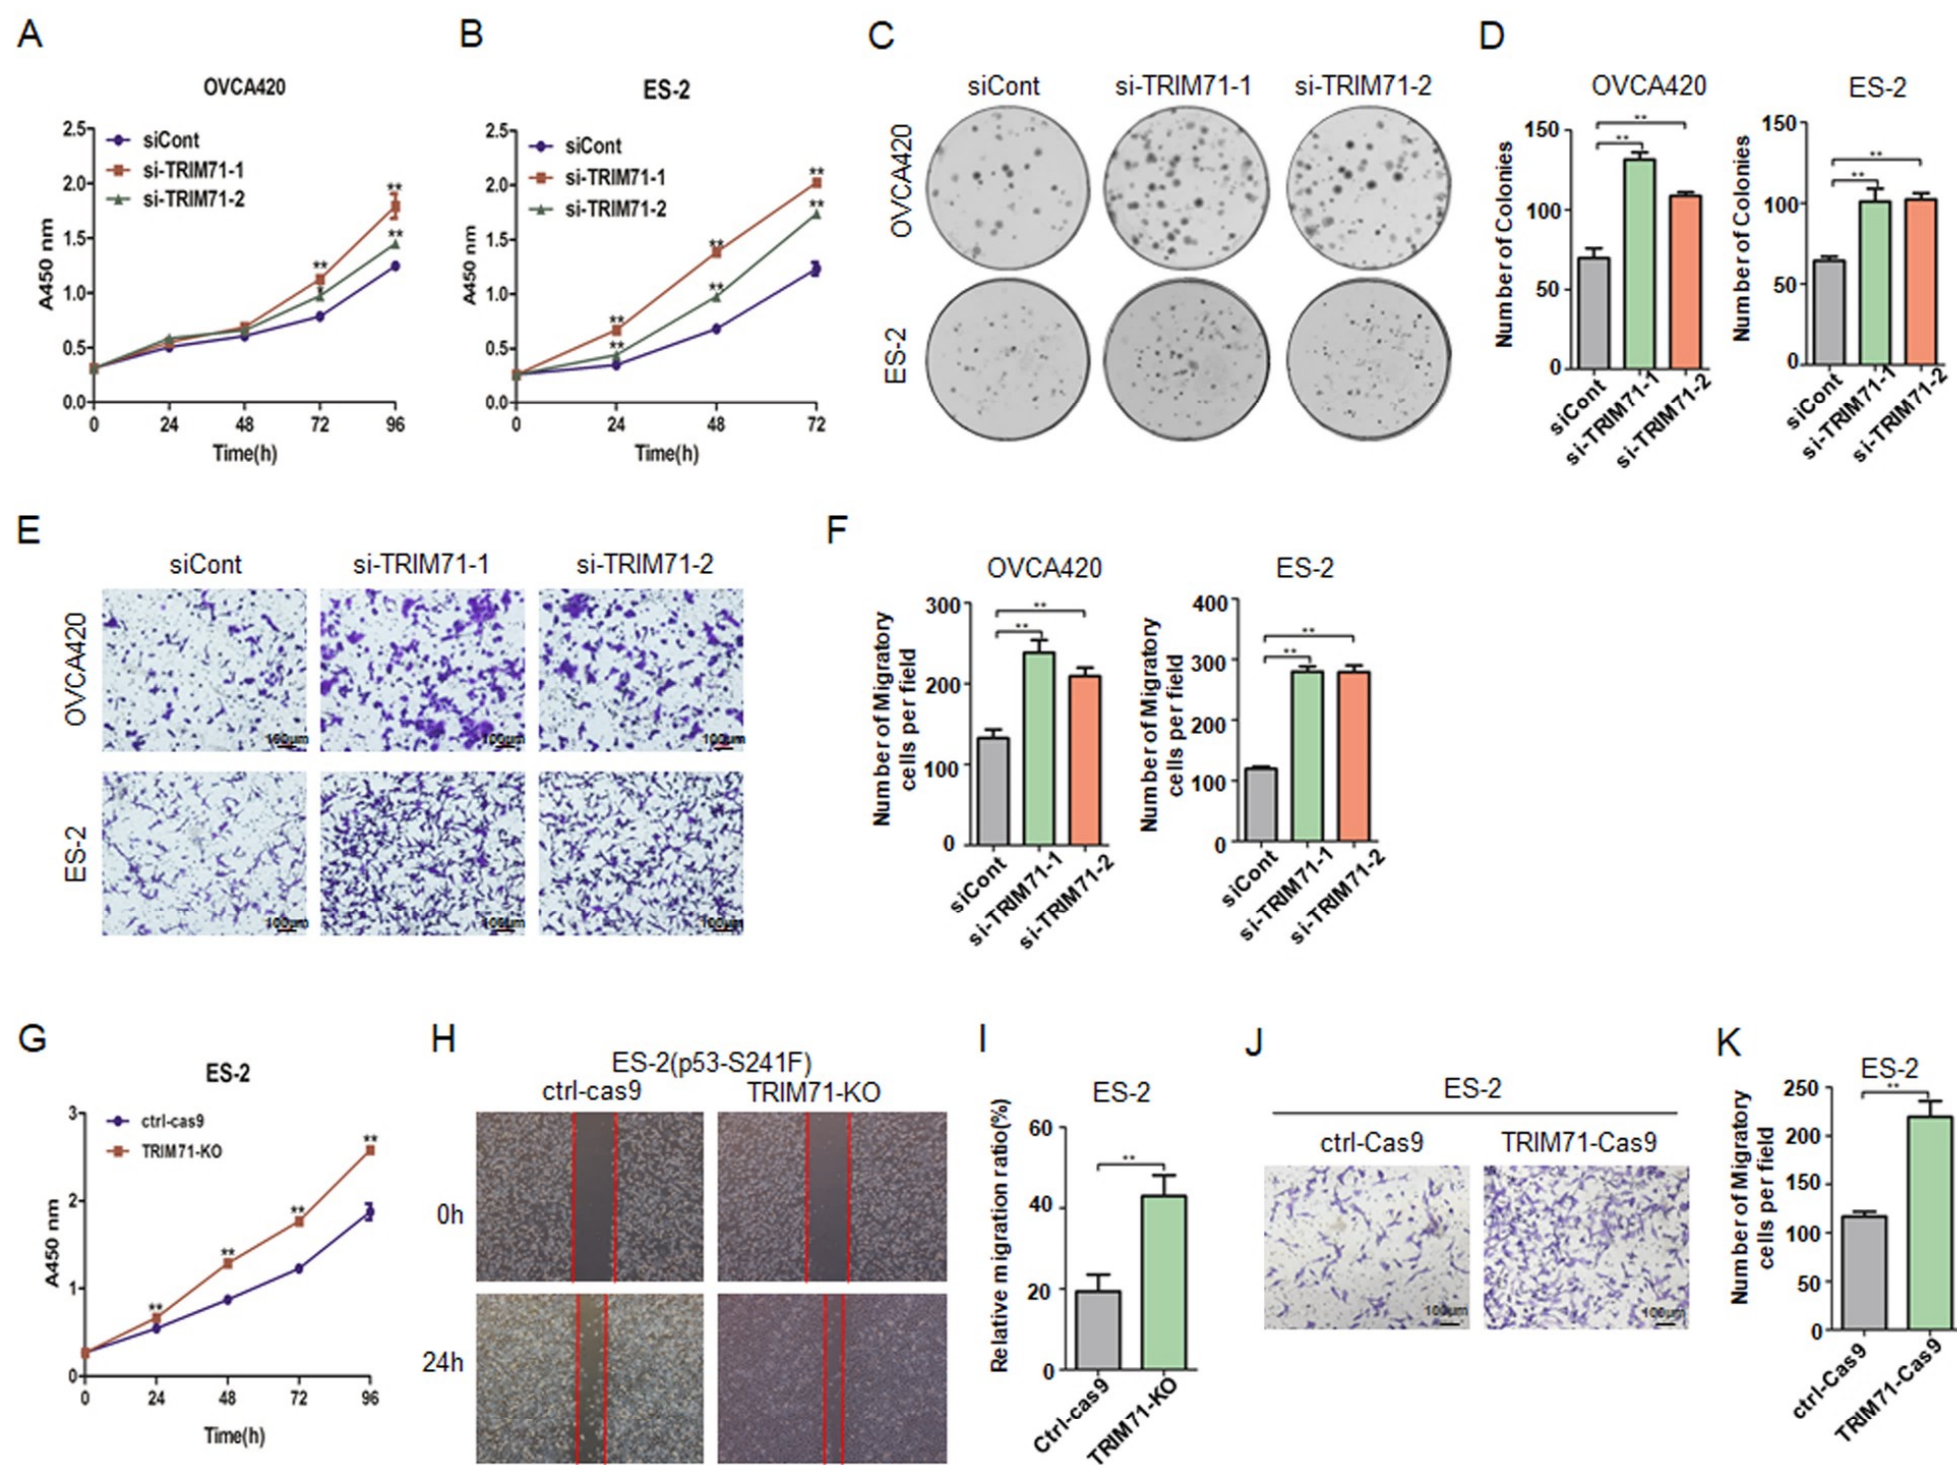

# Figure S7

A

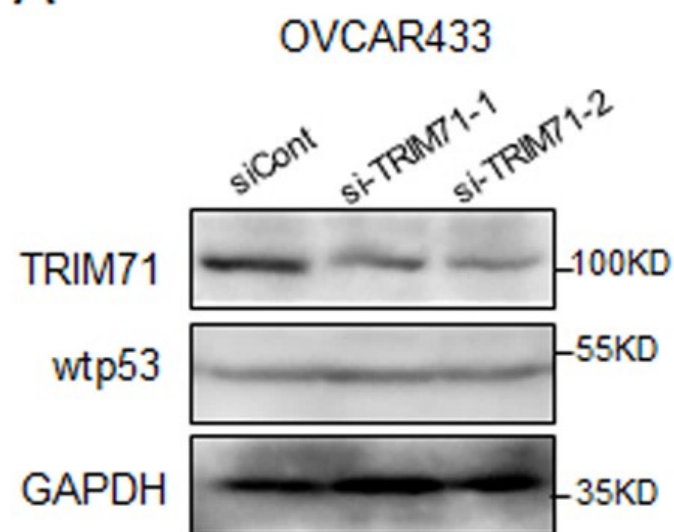

B

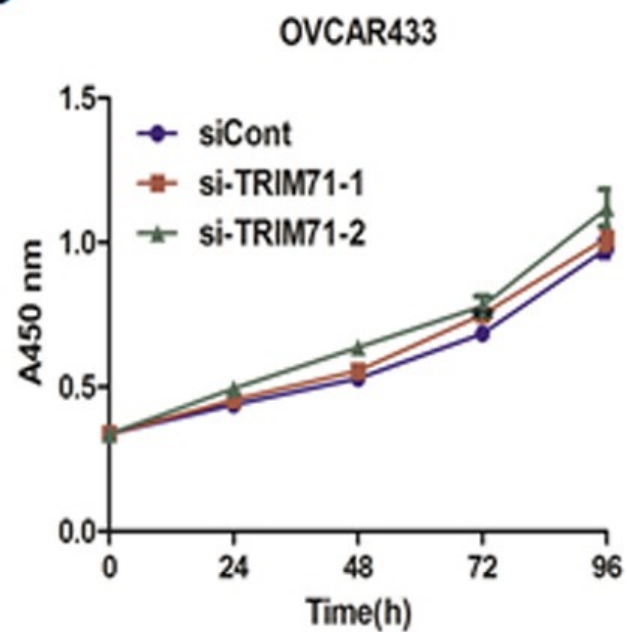

C

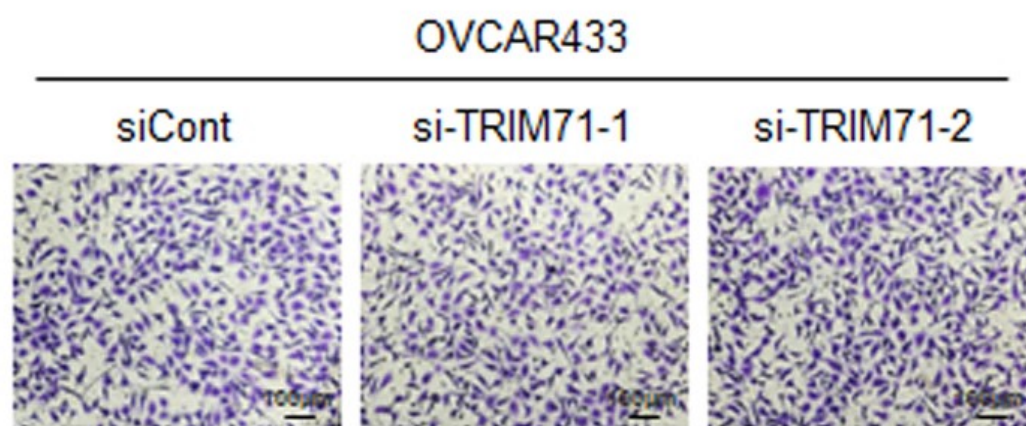

D

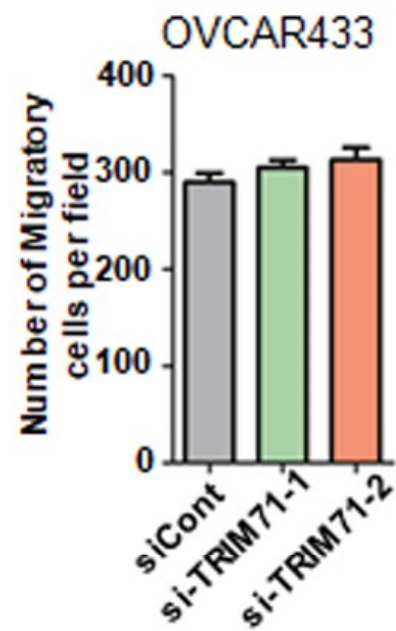

**Figure S8 (related to Figure7)**

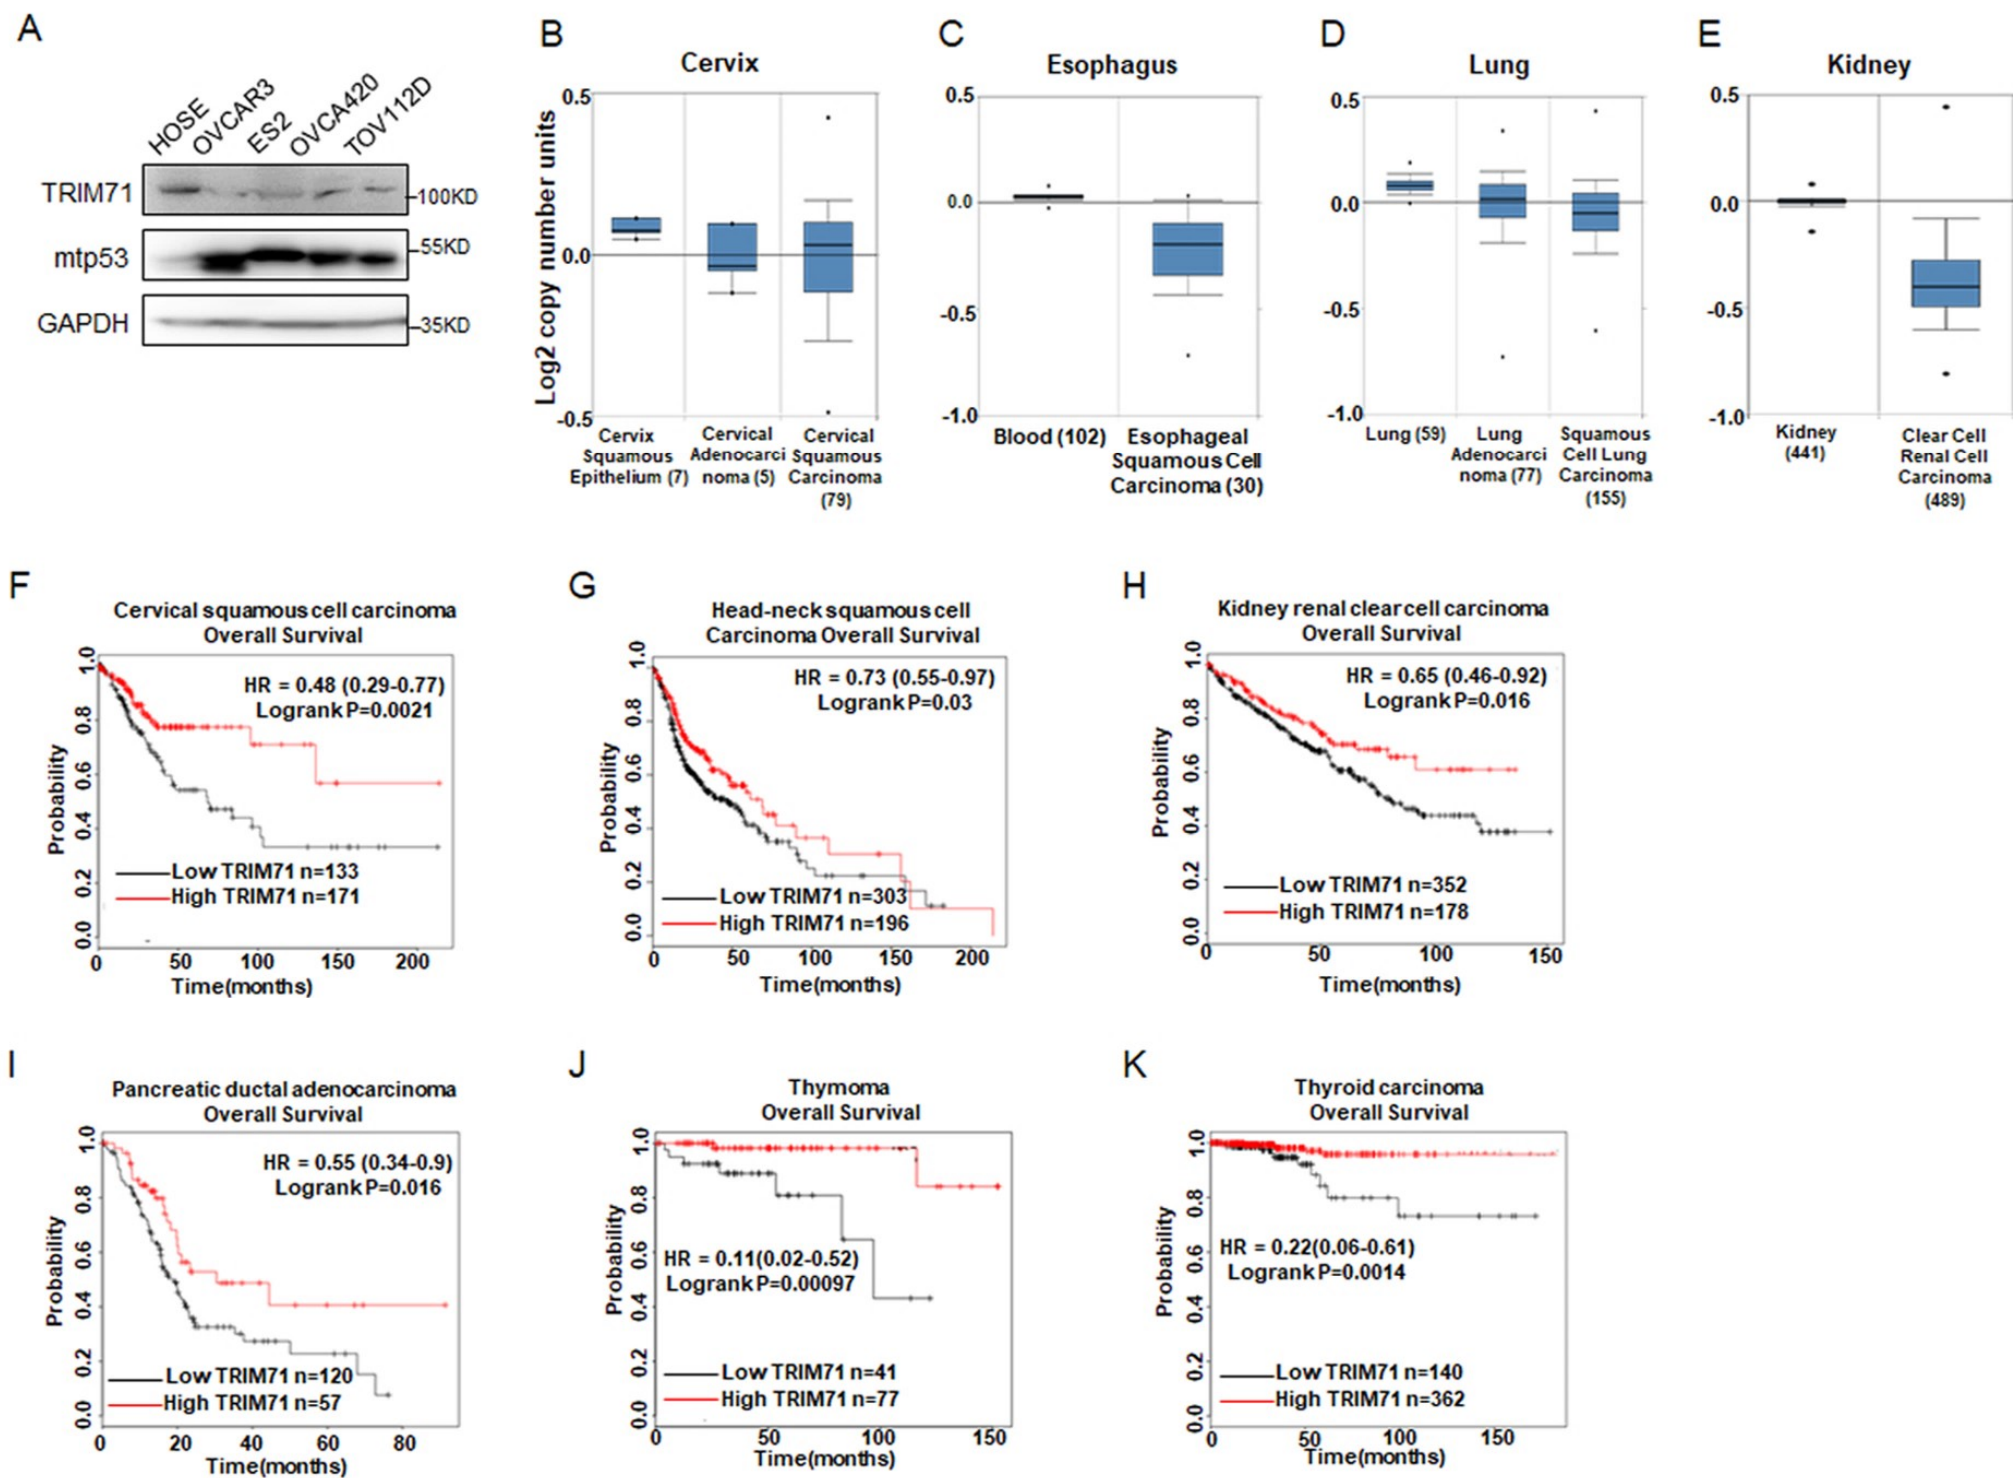

Supplement: 41419_2019_1977_MOESM1_ESM.pdf [file 41419_2019_1977_MOESM1_ESM.pdf]
